# Supplementary material for: Global transcription profiling reveals differential responses to chronic nitrogen stress and putative nitrogen regulatory components in Arabidopsis
Source: PubMed Central journal article supplement (PMC1994689; doi:10.1186/1471-2164-8-281), 2007-08-16
Supplement: 1471-2164-8-281-S1.pdf [file 1471-2164-8-281-S1.pdf]

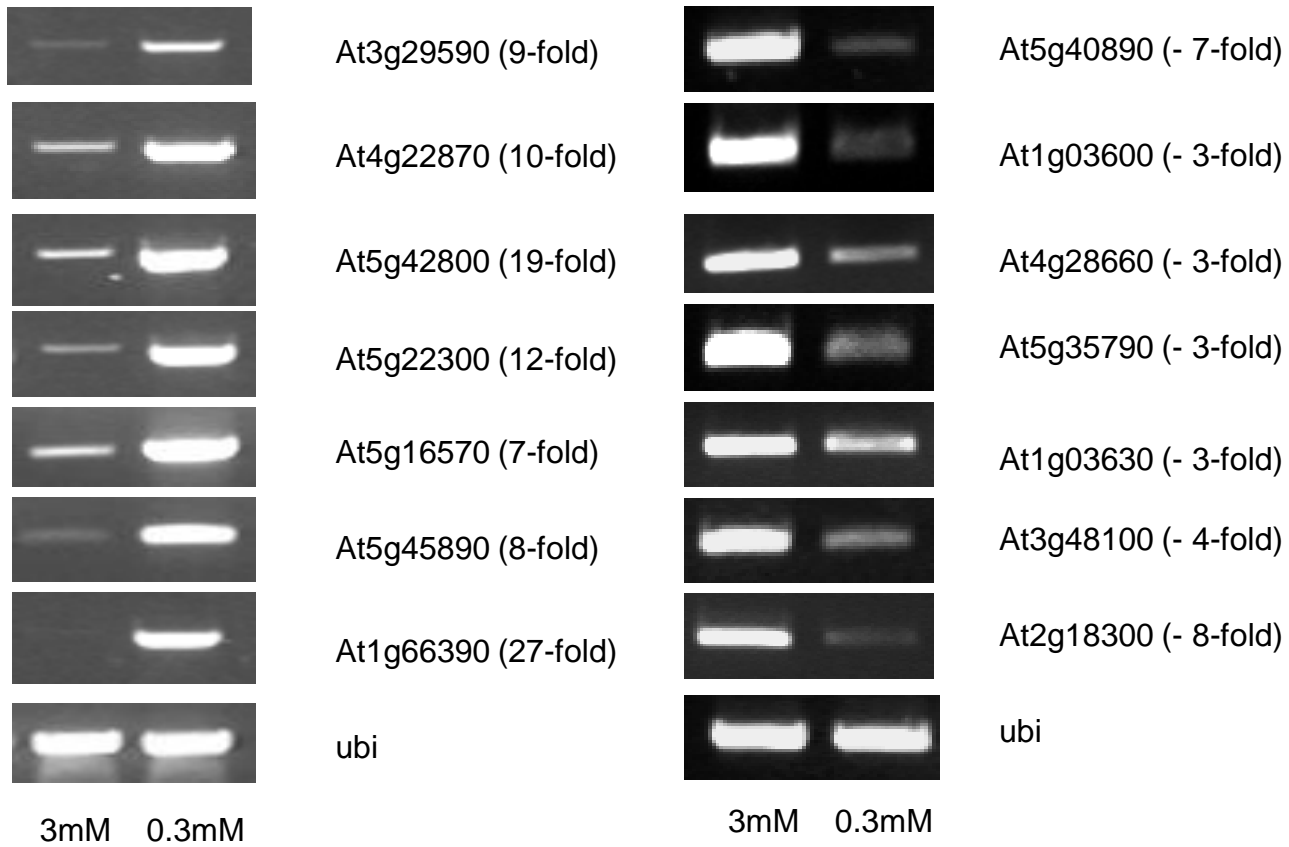

Note: Fold changes from microarray analysis were shown in brackets.
